# Supplementary material for: CDASE—A reliable scheme to explain the reactivity sequence between Diels–Alder pairs
Source: Royal Society of Chemistry journal article supplement (doi:10.1039/b925441b), 2010-01-01
Supplement: b925441b.pdf [file b925441b.pdf]

**Supplementary Information:**

In a classic study Houk and Munchausen<sup>35(a)</sup> have demonstrated that changes in IP and EA values of dienophiles (induced by different substitutions) can be used to predict their reactivity trends in Diels-Alder (DA) reactions. The IP and EA values of the chosen dienes and dienophiles in the present study are reported in Tables S1 and S2, respectively.

**Table S1:** *IP* values (in eV) of the chosen Diels-Alder pairs are generated at MP2(FC)/6-31G(D,P) level.

| Dienes                                                                              | IP (eV) |
|-------------------------------------------------------------------------------------|---------|
|    | 8.86    |
|    | 8.64    |
|    | 8.42    |
|   | 8.47    |
|  | 8.41    |
|  | 7.83    |
|  | 7.37    |
|  | 10.08   |

| Dienophiles                                                                         | IP (eV) |
|-------------------------------------------------------------------------------------|---------|
|    | 12.73   |
|    | 10.50   |
|    | 10.20   |
|    | 11.27   |
|   | 11.24   |
|  | 12.40   |
|  | 13.34   |
|  | 14.30   |
|  | 9.64    |
|  | 11.10   |
|  | 8.65    |
|  | 7.82    |

**Table S2:** *EA* values (in eV) of the chosen Diels-Alder pairs are generated at MP2(FC)/6-31G(D,P) level.

| Dienes                                                                              | EA (eV) | Dienophiles                                                                         | EA (eV) |
|-------------------------------------------------------------------------------------|---------|-------------------------------------------------------------------------------------|---------|
|    | -2.17   |    | -3.85   |
|    | -2.24   |    | -1.77   |
|    | -2.16   |    | -1.47   |
|   | -2.25   |    | -1.72   |
|  | -2.29   |   | -1.07   |
|  | -2.70   |  | -0.24   |
|  | -2.46   |  | 0.70    |
|  | -2.63   |  | 1.26    |
|  | -0.82   |  | -3.91   |
|                                                                                     |         |  | -5.69   |
|                                                                                     |         |  | -4.12   |
|                                                                                     |         |  | -4.23   |
